# Supplementary figures and images for: Engineering a Novel Bivalent Oral Vaccine against Enteric Fever
Source: MDPI journal article supplement (doi:10.3390/ijms22063287), 2021-03-23

Marker

ZH9

ZH9PA

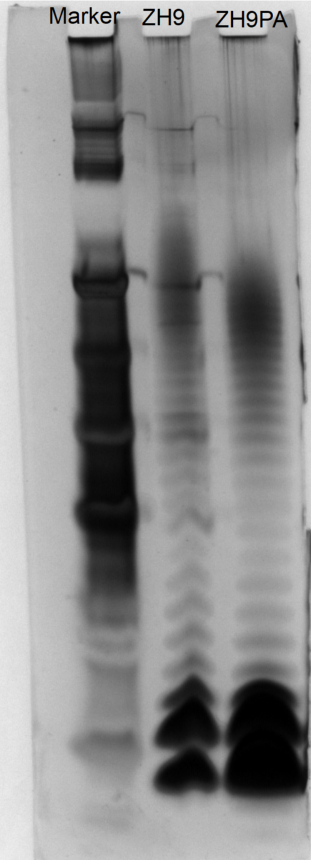

Supplement: s1 [file s1]

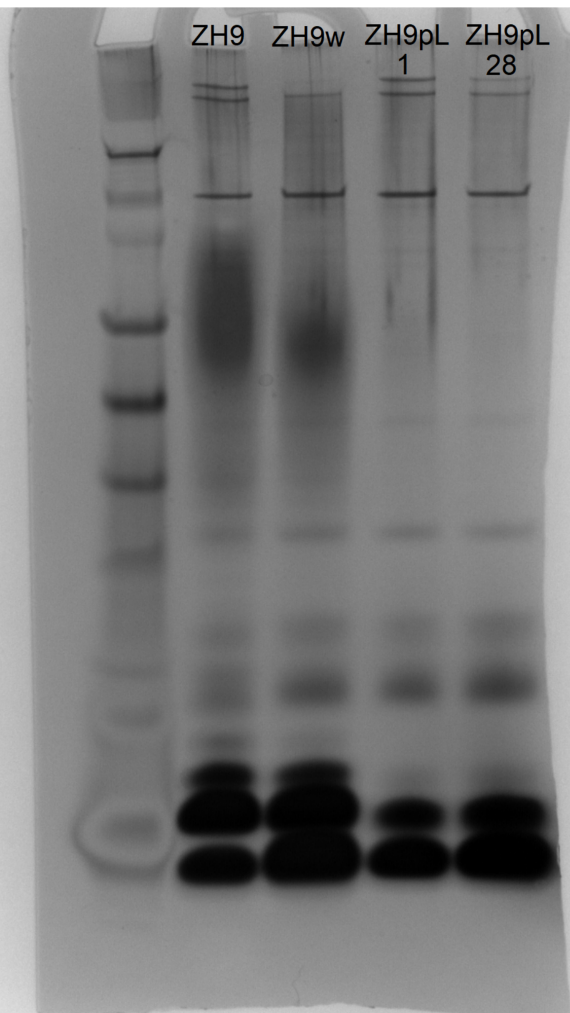

Supplement: s1 [file s1]

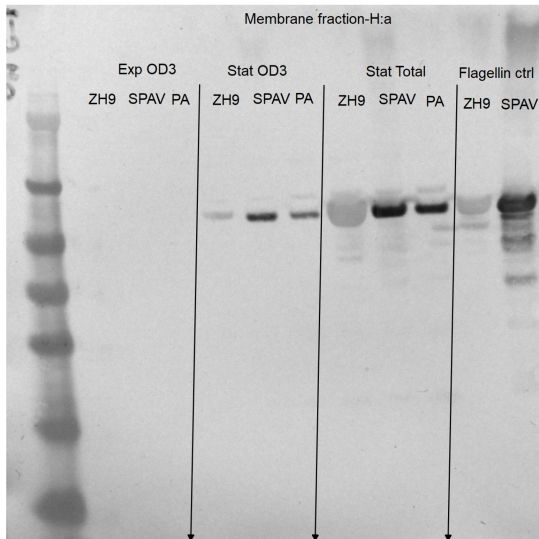

(a)

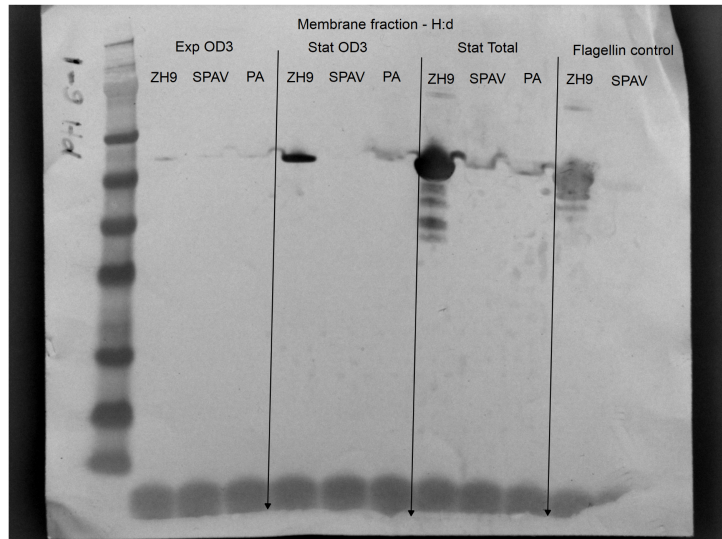

(b)

Supplement: s1 [file s1]

Heat inactivated O/N culture

ZH9

ZH9PA

mAb S.Typhi LPS



1

mAb S.Paratyphi A LPS



1

Supplement: s1 [file s1]
